# Supplementary material for: Slug Feeding Triggers Dynamic Metabolomic and Transcriptomic Responses Leading to Induced Resistance in Solanum dulcamara
Source: Front Plant Sci. 2020 Jun 18;11:803. doi: 10.3389/fpls.2020.00803 (PMC7314995; doi:10.3389/fpls.2020.00803)
Supplement: Supplementary file 3 [file Table_1.xlsx]

## Sheet: ESM
	ELECTRONIC SUPPLEMENTARY Tables
	Manuscript title: Induced resistance to slug herbivory in Solanum dulcamara is related to the temporal and spatial dynamics of metabolomic and transcriptomic responses
	Journal name: New Phytologist
	Authors: Onno W. Calf1, Tobias Lortzing2,3, Alexander Weinhold4,5, Yvonne Pöschl4,6, Janny L. Peters7, Heidrun Huber8, Anke Steppuhn2,3, Nicole M. van Dam1,4,5.
	1: Molecular Interaction Ecology, Institute for Water and Wetland Research (IWWR), Radboud University, Heyendaalseweg 135, 6525 AJ, Nijmegen, the Netherlands
	2: Molecular Ecology, Institute of Biology, Free University Berlin, Albrecht-Thaer-Weg 6, Berlin 14195, Germany
	3: Molecular Botany (190a), Institute of Biology, University of Hohenheim, Garbenstrasse 30, Stuttgart 70593, Germany
	4: German Centre for Integrative Biodiversity Research (iDiv) Halle-Jena-Leipzig, Deutscher Platz 5e, Leipzig 04103, Germany
	5: Institute of Biodiversity, Friedrich Schiller University Jena, Dornburger-Str. 159, Jena 07743, Germany
	6: Institute of Computer Science, Martin Luther University Halle-Wittenberg, Von-Seckendorff-Platz 1, Halle 06120, Germany
	7: Plant Systems Physiology, Institute for Water and Wetland Research (IWWR), Radboud University, Heyendaalseweg 135, 6525 AJ, Nijmegen, the Netherlands
	8: Experimental Plant Ecology, Institute for Water and Wetland Research (IWWR), Radboud University, Heyendaalseweg 135, 6525 AJ, Nijmegen, the Netherlands
	Corresponding author: Nicole M. van Dam
	Tel: +49 3419733165
	Email: nicole.vandam@idiv.de

## Sheet: Table S1
	Table S1 Parent / daughter ion m/z for detected phytohormones and internal standards salicylic acid (SA), jasmonic acid (JA), abscisic acid (ABA), jasmonic acid-isoleucine (JA-Ile) and collision energy used in ion mobility cell.
		measured ions		fragmentation energy
	compound	parent Ion m/z	daughter ion m/z	transfer CE [V]	tap CE [V]
	SA	137	93	2	4
	JA	209	59	2	4
	ABA	263	153	2	4
	JA-Ile	328	130	2	4
	d4-SA	141	97	2	4
	d6-JA	215	59	2	4
	d6-ABA	269	159	2	4
	d6-JA-Ile	328	130	2	4

## Sheet: Table S2
	Table S2 Primer sequences used for qPCR validation of the microarrays
	Gene name	S. dulcamara contig	Primer	Sequence (5'-3')	Type
	CAC	comp3969_c0_seq3	Forward	AGTTTGTTGTTGAGGCTGTTACAC	Reference gene
	CAC	comp3969_c0_seq3	Reverse	ACCGGACACCTTCCTGAGTAATG	Reference gene
	EF1α	comp28_c0_seq4	Forward	TGGTACCTCCCAGGCTGACTGTG	Reference gene
	EF1α	comp28_c0_seq4	Reverse	GCAACGCATGTTCACGGGTCT	Reference gene
	Exp	comp12933_c0_seq1	Forward	CTAAGAACGCTGGACCTAATGACAAG	Reference gene
	Exp	comp12933_c0_seq1	Reverse	AAAGTCGATTTAGCTTTCTCTGCATATTTC	Reference gene
	SAND	comp6973_c0_seq1	Forward	TGCTTACACATGTCTTCCACTTGC	Reference gene
	SAND	comp6973_c0_seq1	Reverse	AAACAGGACCCCTGAGTCAGTTAC	Reference gene
	PR1a	comp374_c0_seq1	Forward	CATAAGGGCCACCAGAGTGT	Microarray validation
	PR1a	comp374_c0_seq1	Reverse	CCCTCAATATCCCAAGCTCA	Microarray validation
	OPR3	comp2015_c0_seq1	Forward	CTGTGACGACTGCTTGAACCAC	Microarray validation
	OPR3	comp2015_c0_seq1	Reverse	AGCTCACGGGTACTTGATCGAC	Microarray validation
	PI1	comp460_c0_seq1	Forward	GCAAGCGAATTGAGTGATGA	Microarray validation
	PI1	comp460_c0_seq1	Reverse	GTGGCCTAACCATACCAGGA	Microarray validation
	KPI4	comp673_c0_seq1	Forward	CAGGTGCAAAGTCGGGAAATCC	Microarray validation
	KPI4	comp673_c0_seq1	Reverse	CCACTTTGTAATTGGACGATGCCA	Microarray validation
	LOXD	comp3729_c0_seq1	Forward	TGTAGGCAGCAGCACTGATCTC	Microarray validation
	LOXD	comp3729_c0_seq1	Reverse	CTCGCCAGAGCTTACTCAATGC	Microarray validation
	PPOA	comp2630_c0_seq2	Forward	ACAAAAGGCCTTACCGTGTG	Microarray validation
	PPOA	comp2630_c0_seq2	Reverse	CCATCTTGTGGAGTGGGAAT	Microarray validation
	ERF4	comp3023_c0_seq1	Forward	AGAGCTTATGATTGTGCGGCGTT	Microarray validation
	ERF4	comp3023_c0_seq1	Reverse	TTCTTTTCCGGCCAATATTCGC	Microarray validation
	PPO	comp16387_c0_seq1	Forward	CGATGACGGGGAATATCATC	Microarray validation
	PPO	comp16387_c0_seq1	Reverse	CCATCGCAATAAGCACAATG	Microarray validation
	NIM1	comp9738_c0_seq1	Forward	CAGCTTCATACGCAAATCATCG	Microarray validation
	NIM1	comp9738_c0_seq1	Reverse	GCATTGAGATTCTGGAGCAAGC	Microarray validation
	CS	comp14877_c0_seq1	Forward	CTGGCGCGTACCTCTTCTTCTG	Microarray validation
	CS	comp14877_c0_seq1	Reverse	TTGGGCATGAAAGTTCCAACGT	Microarray validation

## Sheet: Table S3
	Table S3 Results of OPLS-DA model and t-test statistics for comparison of metabolite profiles of Solanum dulcamara plants that were undamaged with those exposed to feeding by the grey field slug (GFS; Deroceras reticulatum) for 24h or 72h. Models represent the plant response 24h, 48h or 72h after the end of the treatment period (see also Fig. 1) in: a–d) local, damaged leaves; e–h) systemic, unda…
	a) 24 h / 24 h						b) 24 h / 48 h						i)
	Compound	OPLS-DA model		t-test			Compound	OPLS-DA model		t-test			Compound	ID	RT	monoisotopic mass
	(ID_mz_rt)	pcorr	ABS(pcorr)	t	Padj		(ID_mz_rt)	pcorr	ABS(pcorr)	t	Padj		L024	24_253.15_140	140	253.154
	97_389.16_423	-0.91	0.91	6.7	0		99_139.91_56	-0.97	0.97	12.7	0		L026	26_347.20_377	377	347.199
	99_139.91_56	-0.85	0.85	4.6	0.001		97_389.16_423	-0.92	0.92	7.9	0		L005	5_251.14_236	236	251.138
	136_125.09_463	-0.84	0.84	5.5	0		118_245.09_430	0.87	0.87	-5.6	0		L053	53_219.15_383	383	219.147
	42_225.15_341	-0.76	0.76	3.6	0.005		22_219.10_442	-0.74	0.74	3.6	0.005		L050	50_267.17_264	264	267.169
	7_188.07_262	0.74	0.74	-3.8	0.003		50_267.17_264	0.73	0.73	-3.5	0.006		L007	7_188.07_262	262	188.07
	18_152.06_90	0.7	0.7	-3.2	0.009		119_385.15_429	-0.73	0.73	3.4	0.007		L119	119_385.15_429	429	385.146
							61_363.10_259	-0.71	0.71	3.1	0.011		L088	88_395.20_471	471	395.203
							24_253.15_140	0.7	0.7	-3.1	0.012		L097	97_389.16_423	423	389.162
													L099	99_139.91_56	56	139.914
	c) 24 h / 72 h						d) 72 h / 24 h						S058	58_276.22_329	329	276.215
	Compound	OPLS-DA model		t-test			Compound	OPLS-DA model		t-test			S129	129_723.45_476	476	723.451
	(ID_mz_rt)	pcorr	ABS(pcorr)	t	Padj		(ID_mz_rt)	pcorr	ABS(pcorr)	t	Padj		S094	94_358.27_447	447	358.272
	88_395.20_471	-0.94	0.94	8.7	0		101_227.13_350	0.99	0.99	-19.1	0		S116	116_224.13_60	60	224.127
	26_347.20_377	0.93	0.93	-7.5	0		24_253.15_140	0.97	0.97	-12.9	0		S101	101_332.13_242	242	332.133
	24_253.15_140	0.9	0.9	-6.9	0		88_395.20_471	-0.95	0.95	8.7	0		L124 / S147	124_377.15_358	358	377.147
	7_188.07_262	0.86	0.86	-5.6	0		26_347.20_377	0.94	0.94	-8	0
	97_389.16_423	-0.86	0.86	5.1	0		7_188.07_262	0.9	0.9	-6.2	0
	119_385.15_429	-0.85	0.85	4.9	0.001		97_389.16_423	-0.9	0.9	6	0
	53_219.15_383	0.81	0.81	-4.7	0.001		5_251.14_236	0.84	0.84	-4.7	0.001
	81_275.15_440	-0.81	0.81	4.1	0.002		127_322.97_63	0.84	0.84	-5	0.001
	5_251.14_236	0.79	0.79	-4	0.002		53_219.15_383	0.83	0.83	-4.4	0.001
	50_267.17_264	0.76	0.76	-3.7	0.004		50_267.17_264	0.8	0.8	-3.9	0.003
	124_377.15_358	0.73	0.73	-3.2	0.01		15_209.15_454	-0.79	0.79	3.8	0.004
	18_152.06_90	0.72	0.72	-3.4	0.006		84_265.14_301	-0.79	0.79	3.7	0.004
	131_361.13_316	-0.72	0.72	3.1	0.012		31_348.07_85	0.77	0.77	-3.9	0.003
	117_356.13_89	-0.71	0.71	3.1	0.011		59_201.11_429	-0.76	0.76	3.8	0.004
	25_295.16_291	0.71	0.71	-3.1	0.011		49_207.05_83	-0.74	0.74	3.8	0.003
	130_525.15_346	0.7	0.7	-3	0.013		GA3_884.49_702	0.74	0.74	-3.3	0.008
							47_433.17_418	-0.72	0.72	3.1	0.011
							28_265.15_304	0.72	0.72	-3.1	0.012
							40_434.20_394	0.72	0.72	-3.2	0.01
							71_221.09_88	0.72	0.72	-3.2	0.01
							110_182.08_83	-0.71	0.71	3.2	0.009
							119_385.15_429	-0.71	0.71	3.1	0.011
							67_189.13_374	-0.71	0.71	3.3	0.009
							115_268.10_89	-0.7	0.7	3.1	0.011
	e) 24 h / 24 h						f) 24 h / 48 h
	Compound	OPLS-DA model		t-test			Compound	OPLS-DA model		t-test
	(ID_mz_rt)	pcorr	ABS(pcorr)	t	Padj		(ID_mz_rt)	pcorr	ABS(pcorr)	t	Padj
	145_406.16_343	-0.86	0.86	4.8	0.001		77_217.07_270	0.97	0.97	-11.8	0
	116_224.13_60	-0.72	0.72	3.2	0.01		120_263.15_403	0.96	0.96	-11.1	0
	94_358.27_447	-0.72	0.72	3.2	0.01		94_358.27_447	-0.86	0.86	5.2	0
	97_122.10_450	0.71	0.71	-2.9	0.015		116_224.13_60	-0.81	0.81	4.6	0.001
							135_432.25_82	0.8	0.8	-4.4	0.001
							101_332.13_242	-0.72	0.72	3.2	0.01
							35_293.10_343	0.72	0.72	-3.4	0.007
							96_529.24_260	-0.7	0.7	3.1	0.01
							58_276.22_329	0.7	0.7	-3.2	0.01
	g) 24 h / 72 h						h) 72 h / 24 h
	Compound	OPLS-DA model		t-test			Compound	OPLS-DA model		t-test
	(ID_mz_rt)	pcorr	ABS(pcorr)	t	Padj		(ID_mz_rt)	pcorr	ABS(pcorr)	t	Padj
	129_723.45_476	0.99	0.99	-35.7	0		129_723.45_476	1	1	-43	0
	162_570.22_379	0.83	0.83	-4.7	0.001		116_224.13_60	-0.99	0.99	16.2	0
	GA4_868.49_726	0.74	0.74	-3.4	0.006		101_332.13_242	-0.87	0.87	5.7	0
	78_206.08_384	-0.73	0.73	3.2	0.01		69_248.19_320	-0.86	0.86	5.4	0
	147_377.15_358	0.72	0.72	-3.3	0.008		121_244.09_58	0.82	0.82	-4.6	0.001
	58_276.22_329	0.71	0.71	-3.6	0.005		39_147.04_390	-0.74	0.74	3.4	0.007
	149_495.06_59	-0.71	0.71	3	0.013		154_232.19_347	-0.73	0.73	3.2	0.009
	42_161.15_427	0.7	0.7	-3	0.014		GA3_884.49_702	0.72	0.72	-3.2	0.01
							71_204.16_210	-0.71	0.71	3.2	0.009
							58_276.22_329	0.71	0.71	-3.1	0.012
	i)

## Sheet: Table S4
	Table S4 Log2-transformed fold-differences (FD) in expression of the 25 most strongly regulated contigs according to microarray analyses of Solanum dulcamara leaves a) directly (0h) after 24 h exposure to feeding by the grey field slug (Deroceras reticulatum), or b) after an additional 24h without exposure to slug feeding. P-values were adjusted (Padj) for the false discovery rate. Contigs are so…
	a) 0 h
	Contig ID	ITAG 2.3 ID	logFD	Padj	Description
	comp521_c0_seq1	Solyc07g006570.2.1	7.8	0	S8-Rnase
	comp460_c0_seq1	Solyc09g089510.2.1	7.7	0	Proteinase_inhibitor_I
	comp2630_c0_seq3	Solyc08g074680.2.1	7.3	0.005	Polyphenol_oxidase
	comp6001_c0_seq1	Solyc07g064600.2.1	7.1	0	Endoribonuclease_L-PSP_family_protein
	comp4507_c0_seq1	Solyc08g006850.2.1	7.1	0.002	Patatin-like_phospholipase_family_protein
	comp15183_c0_seq1	Solyc11g071470.1.1	6.2	0	Hydroxycinnamoyl_CoA_shikimate/
					quinate_hydroxycinnamoyltransferase-like_protein
	comp673_c0_seq1	Solyc11g022590.1.1	6.2	0.001	Kunitz_trypsin_inhibitor_4
	comp7825_c0_seq1	Solyc08g076970.2.1	6.2	0	Acetylornithine_deacetylase_or_
					succinyl-diaminopimelate_desuccinylase
	comp1691_c0_seq2	Solyc07g041900.2.1	6.1	0.003	Cathepsin_L-like_cysteine_proteinase
	comp4767_c0_seq1	Solyc05g053960.2.1	6	0	Cysteine-rich_extensin-like_protein-2
	comp1119_c0_seq1	Solyc11g022590.1.1	6	0.046	Kunitz_trypsin_inhibitor_4
	comp23535_c0_seq1	Solyc10g078780.1.1	5.9	0	Seed_maturation_protein_LEA_4
	comp10758_c0_seq1	Solyc10g076660.1.1	5.8	0	Anthocyanidin_synthase
	comp21613_c0_seq1	Solyc11g066640.1.1	5.8	0	Hydroxycinnamoyl_CoA_shikimate/
					quinate_hydroxycinnamoyltransferase-like_protein
	comp3101_c0_seq2	Solyc08g076990.2.1	5.8	0	Acetylornithine_deacetylase
	comp4199_c0_seq1	Solyc03g098700.1.1	5.8	0	Cysteine_protease_inhibitor_8
	comp21413_c0_seq1	Solyc01g095960.2.1	5.8	0	Diacylglycerol_O-acyltransferase
	comp769_c0_seq1	Solyc03g006700.2.1	5.8	0.002	Peroxidase
	comp6006_c0_seq1	Solyc02g077970.2.1	5.7	0.001	Late_embryo_abundance_protein
	comp27958_c0_seq1	Solyc04g078340.2.1	5.5	0	Cytochrome_P450
	comp21537_c0_seq1	Solyc02g070130.1.1	5.4	0	FAD-binding_domain-containing_protein
	comp730_c0_seq1	Solyc06g062370.2.1	5.4	0.008	Acid_phosphatase
	comp9579_c0_seq1	Solyc05g054890.2.1	5.4	0.001	ABC_transporter_G_family_member_1
	comp9050_c0_seq1	Solyc00g138060.2.1	5.3	0.001	2-oxoglutarate-dependent_dioxygenase
	comp4088_c0_seq1	Solyc09g008670.2.1	5.3	0	Threonine_ammonia-lyase_biosynthetic
	b) 24 h
	Contig ID	ITAG 2.3 ID	logFD	Padj	Description
	comp11770_c0_seq1	Solyc01g080010.2.1	5.5	0.022	Xylanase_inhibitor
	comp1691_c0_seq2	Solyc07g041900.2.1	5.2	0.039	Cathepsin_L-like_cysteine_proteinase
	comp6001_c0_seq1	Solyc07g064600.2.1	5.1	0.023	Endoribonuclease_L-PSP_family_protein
	comp29736_c0_seq1	Solyc01g108360.2.1	4.7	0.001	Copper_ion_binding_protein
	comp460_c0_seq1	Solyc09g089510.2.1	4.5	0.015	Proteinase_inhibitor_I
	comp521_c0_seq1	Solyc07g006570.2.1	4.5	0.033	S8-Rnase
	comp1206_c0_seq1	Solyc07g008560.2.1	4.4	0.044	Purple_acid_phosphatase
	comp18975_c0_seq1	NA	4.3	0.011	NA
	comp21613_c0_seq1	Solyc11g066640.1.1	4.2	0.002	Hydroxycinnamoyl_CoA_shikimate/
					quinate_hydroxycinnamoyltransferase-like_protein
	comp22651_c0_seq1	Solyc03g098680.2.1	4.1	0.036	Kunitz_trypsin_inhibitor
	comp21537_c0_seq1	Solyc02g070130.1.1	3.9	0.013	FAD-binding_domain-containing_protein
	comp1237_c0_seq1	Solyc06g065970.1.1	3.9	0.035	Cortical_cell-delineating_protein
	comp20137_c0_seq1	Solyc05g046040.1.1	3.8	0	CONSTANS-like_zinc_finger_protein
	comp25366_c0_seq1	Solyc02g070090.1.1	3.8	0.012	FAD-binding_domain-containing_protein
	comp13315_c0_seq1	NA	3.7	0.044	NA
	comp6358_c0_seq1	Solyc02g084850.2.1	3.7	0.044	Unknown_Protein
	comp16999_c0_seq1	Solyc07g063560.2.1	3.7	0.003	Cotton_fiber_expressed_protein_1
	comp13503_c0_seq1	Solyc05g050880.2.1	3.6	0.002	Peroxidase
	comp16387_c0_seq1	Solyc02g078650.2.1	3.5	0.024	Polyphenol_oxidase
	comp25796_c0_seq1	Solyc09g075330.2.1	3.5	0.042	Pectinesterase
	comp18980_c0_seq1	Solyc02g092820.2.1	3.5	0.022	Indole-3-acetic_acid-amido_synthetase_GH3.8
	comp15647_c0_seq1	Solyc02g014730.2.1	3.5	0.022	Cytochrome_P450
	comp4199_c0_seq1	Solyc03g098700.1.1	3.5	0.022	Cysteine_protease_inhibitor_8
	comp7708_c0_seq1	Solyc07g008120.2.1	3.3	0.027	Blue_copper_protein
	comp14378_c0_seq2	Solyc07g052790.1.1	-3.8	0.037	Nbs-lrr,_resistance_protein
